# Supplementary material for: Luminescent multi-terpyridine ligands: towards 2D polymer formation in solution
Source: Royal Society of Chemistry journal article supplement (doi:10.1039/c4pp00056k), 2014-06-02
Supplement: c4pp00056k1.pdf [file c4pp00056k1.pdf]

## Supporting Information

### Luminescent multi-terpyridine ligands: towards 2D polymer formation in solution

Maria Elena Gallina,<sup>a</sup> Giacomo Bergamini,<sup>a</sup> Simone Di Motta,<sup>a</sup> Junji Sakamoto,<sup>b</sup> Fabrizia Negri,<sup>a\*</sup>  
Paola Ceroni<sup>a\*</sup>

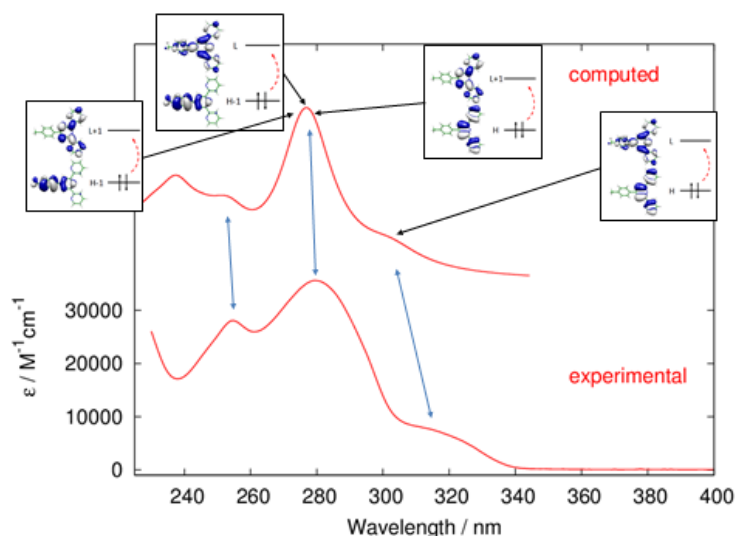

A)

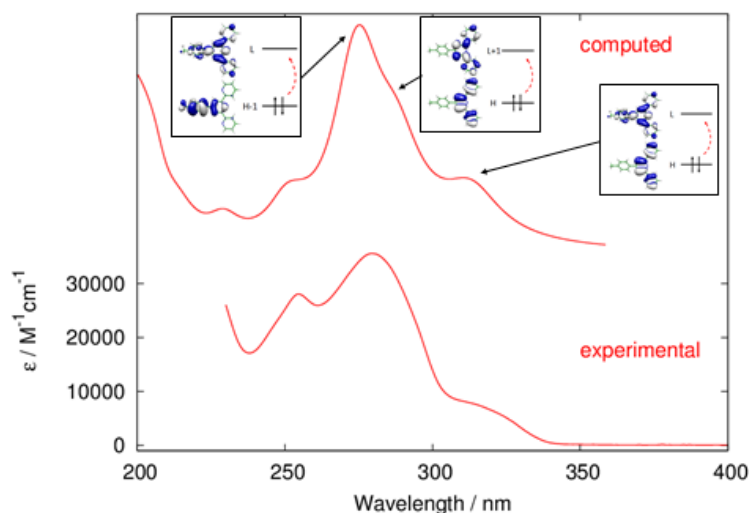

B)

**Figure S1.** A) Comparison between experimental (bottom) and TD-B3LYP/6-31G\* computed absorption spectrum of tol-tpy (top). B) Similar comparison but with TD-CAM-B3LYP/6-31G\* computed absorption spectrum of tol-tpy. In this case computed excitation energies were rescaled to the observed values for an easier comparison. The orbital nature of the lowest energy transitions is also indicated.

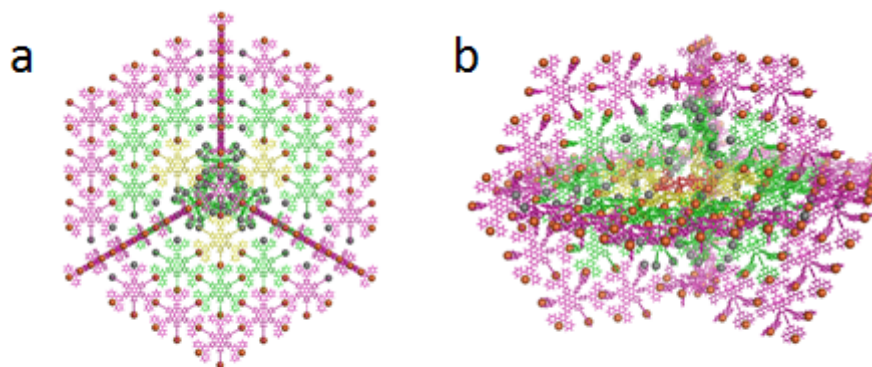

**Figure S2.** Model of a 3D structure similar to that of Figure 6, but built using **M6-90** less stable conformers. The core monomer is shown in red, the first generation row in yellow, the second generation row in green and the third generation in magenta;  $\text{Fe}^{2+}$  are shown as brown spheres when involved in 2:1 ligand to metal binding and grey for  $\text{Fe}^{2+}$  bound to only one tpy unit.

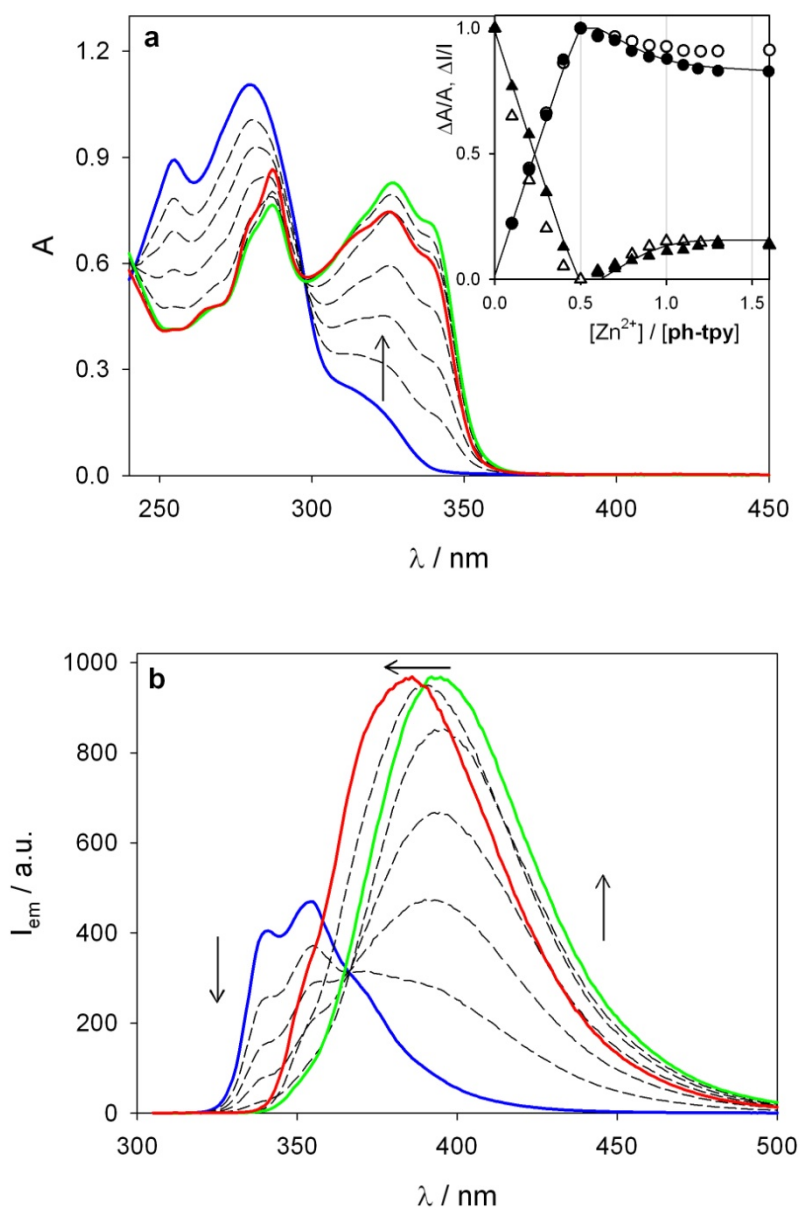

**Figure S3.** Absorption (a) and emission spectra (b) of a  $3.1 \times 10^{-5}$  M solution of **tol-tpy** in  $\text{CH}_2\text{Cl}_2$  upon titration with  $\text{Zn}(\text{CF}_3\text{SO}_3)_2$ : 0 eq. (solid blue line), 0.5 eq. (solid green line), 1.0 eq. (solid red line).  $\lambda_{\text{ex}} = 297$  nm. Inset shows normalized absorption changes at 287 (solid triangles) and 326 nm (solid circles), and normalized emission changes at 344 (empty triangles) and 392 nm (empty circles).

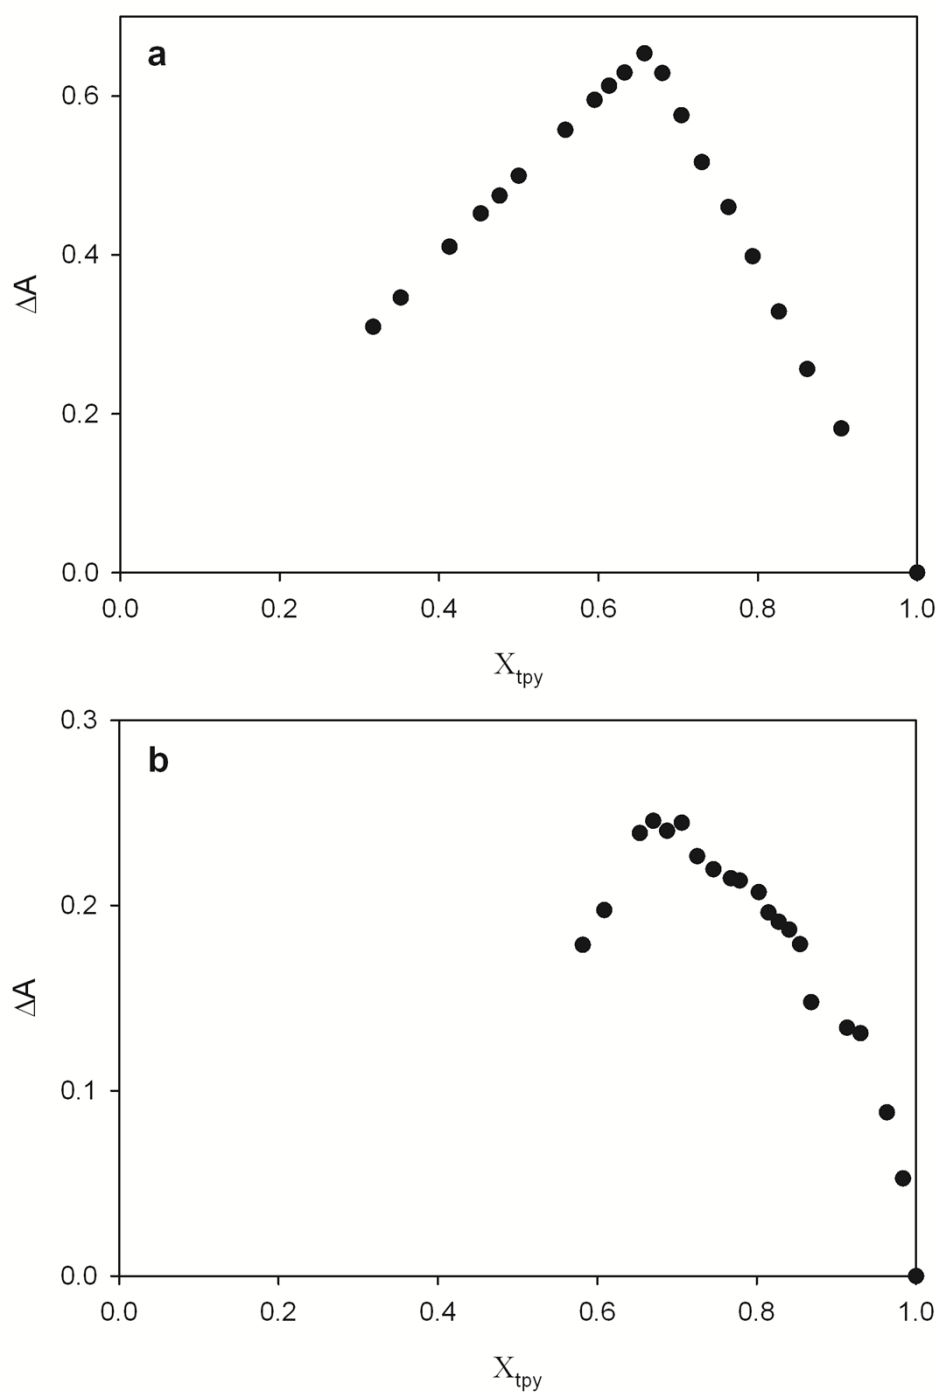

**Figure S4.** Job's plot corresponding to the titration of **tol-tpy** and **M6** in  $\text{CH}_2\text{Cl}_2$  upon addition of  $\text{Zn}(\text{CF}_3\text{SO}_3)_2$ . The absorbance changes are plotted at 570 nm (a) and 286 nm (b) as a function of the molar fraction of terpyridine ligands. Slightly different plots are obtained for **M6** at different wavelength.
